# Supplementary material for: Rationalizing Outcomes: Interdependent Learning in Competitive Markets
Source: Atypon-hosted journal article supplement (doi:10.1287/stsc.2018.0083), 2024-01-08
Supplement: stsc.2018.0083.sm1.pdf [file stsc.2018.0083.sm1.pdf]

## Online Appendix

Figure OA1: Sweep of True Demand Idiosyncratic Demand Parameter with  $\beta_1 = 0, -2.5, -5,$  and  $-7.5$  and initial prior  $b_1 = b_2 = \beta_1$

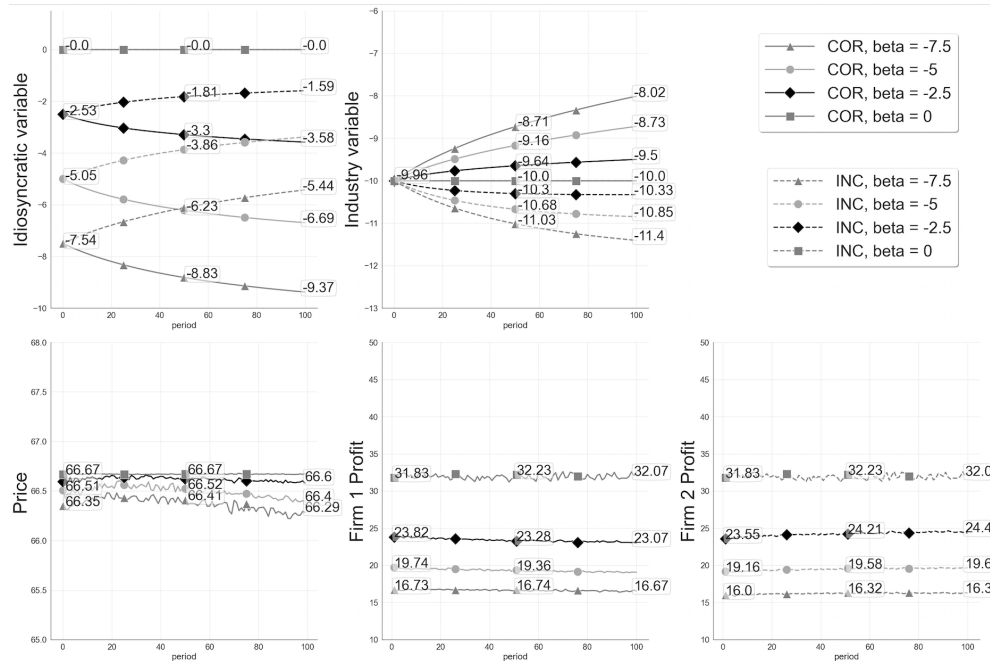

Figure OA2: Base Demand Structure Simulation Run Results of the Positive Idiosyncratic Case with  $\beta_1 = +2.5$ .

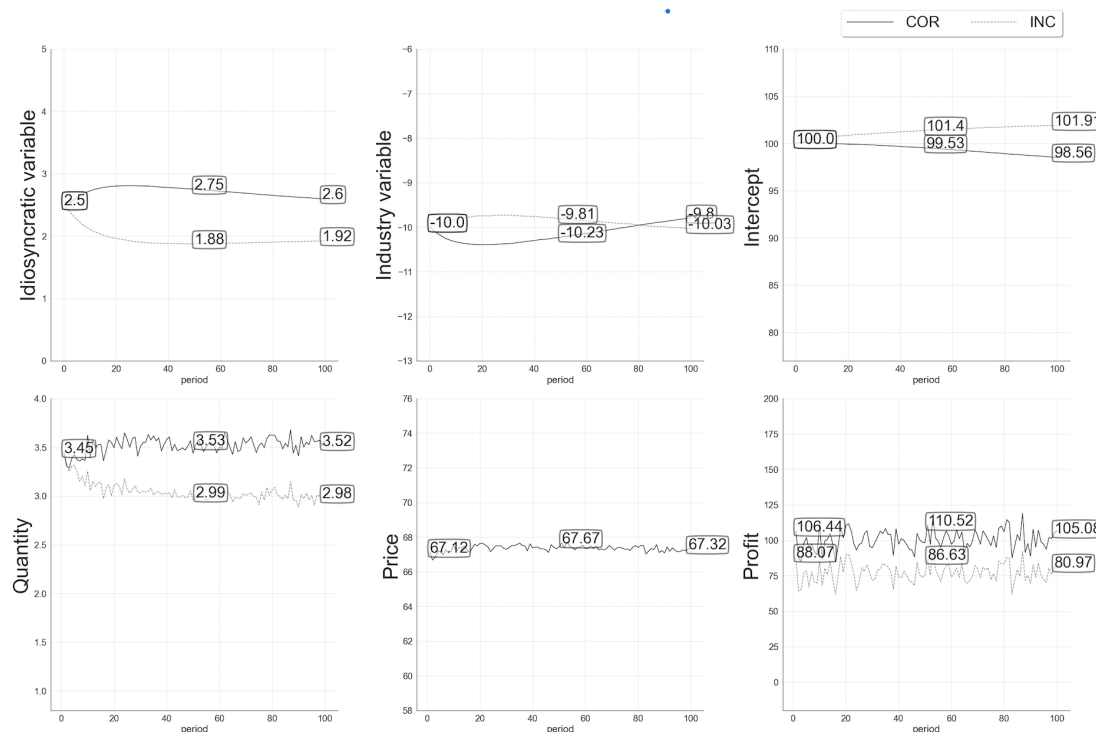

### ***Simplified Python Code for the Demand Structure Model (for $\beta_1$ nonpositive)***

This code consists of four modules: S3simplified\_runsim.py, S3\_simfunctions.py, S3\_graphfunctions.py, and S3\_paramfunctions.py. Use S3simplified\_runsim.py to set parameters and run program.

#### **S3simplified\_runsim.py**

```
# -*- coding: utf-8 -*-
"""
April 6, 2023
# Use this file to set parameters and run simulation using Python 3.8
# This set of programs is a simplified version of the simulation of the
base demand structure model with
#   correct and incorrect MR firms and self-projection.
# This simplified version works for negative-starting-valued idiosyncratic
terms.
# The simulation also requires S3_simfunctions.py, S3_paramfunctions.py,
and S3_graphfunctions.py files.

"""
import os
import S3_paramfunctions as pm

'''important for file path'''
version_no = 'S3'

if __name__ == '__main__':

    iterations = 10000

    idio_beta = -5
    ind_beta = -10

    #True demand parameters
    true_alpha_0 = 100
    true_idio_beta = -5
    true_ind_beta = -10

    #structurally correct firm's demand parameters
    cor_alpha_0 = 100
    cor_idio_beta = -5
    cor_ind_beta = -10

    #structurally incorrect firm's demand parameters
    inc_alpha_0 = 100
    inc_idio_beta = -5
    inc_ind_beta = -10

    coeffs = {'true_alpha_0': true_alpha_0, 'true_idio_beta':
true_idio_beta, 'true_ind_beta': true_ind_beta,
```

```

        'cor_alpha_0': cor_alpha_0, 'cor_idio_beta':
cor_idio_beta, 'cor_ind_beta': cor_ind_beta,
        'inc_alpha_0': inc_alpha_0, 'inc_idio_beta':
inc_idio_beta, 'inc_ind_beta': inc_ind_beta}

    phx_var = 0.5
    phq_var = 0.5
    x_var = 0.3
    phlen = 20
    max_q = 50
    periods = 100

    last_fold = 'outputgraphfolder' + str(iterations) + 'it'
    directory = os.path.join(os.getcwd(), str(version_no),

last_fold,str([true_alpha_0,true_idio_beta,0,true_ind_beta]))

    # %% Creating the parameter list
    param_list = pm.generate_param_list(iterations, coeffs,
        phx_var, phq_var, x_var, phlen, max_q, periods,
        last_fold, directory)

    # %% Running the simulation on the parameter list to create csv's.
    csv_name, dir_list, initial_weights =
pm.run_through_parameters(param_list, directory, version_no, last_fold,
        rerun_sim = True) #rerun_sim =
True if you want sim csv files to be generated even if an one already
exists at the file path.

```

### **simfunctions.py**

```

# -*- coding: utf-8 -*-
"""
Created Feb. 4 2022

"""

import os
import numpy as np
import pandas as pd

import multiprocessing as mp
from multiprocessing import Pool
import concurrent.futures

def olsfunction(x, y):
    '''

```

```

Returns coefficients and adjusted r-squared for OLS regression in
variable results.
Results is a dictionary that contains coefficients as the first term
and adjusted r-square, adjrsq, as the second term.
'''
    results={}
    A=np.c_[np.ones(len(y)),x] # generate matrix containing column of 1's
(for intercept term) appended to X matrix
    olsresults = np.linalg.lstsq(A, y, rcond = -100) # find coefficient
vector that minimizes squared residuals
    results['coefficients']=olsresults[0] # store coefficient vector in
'results' list
    ss_res=0 # initialize sum of squared residuals
    for row in range(len(y)):
        ss_res+=(y[row]-sum(A[row,:]*olsresults[0]))**2 # find sum of
squared residuals
    df_reg=len(y)-int(x.shape[1])-1 # save degrees of freedom of
regression
    df_tot = len(y)-1 # total degrees of freedom
    adjrsq=1-((ss_res/df_reg)/((y.size*y.var())/df_tot)) # find adjusted r
squared
    results['adjrsq']=adjrsq # store adjusted r q=squared value in results
return results

def truncate(f, n):
    '''Truncates/pads a float f to n decimal places without rounding'''
    s = '{}'.format(f)
    if 'e' in s or 'E' in s:
        return '{0:.{1}f}'.format(f, n)
    i, p, d = s.partition('.')
    return '.'.join([i, (d+'0'*n)[:n]])

class Firm:
    def __init__(self, mental_model, init_betas, global_cost):
        self.mm = mental_model
        self.init_b = init_betas
        self.cost = global_cost
        self.cap = 0
        self.cap_maxedout = 0
        self.cap_posdemand = 0
        self.Q_lessthan_zero = 0

    def gen_init_history(self, init_hist_length, prehistmean, prehist_sd,
        prehistmean_Q, prehist_sd_Q, directory, filebegin,
runsim_it, firm_num):

        weights_mm = self.init_b

        pre_hist_cov, pre_hist_covx1x2, pre_hist_covx1x3, pre_hist_covx2x3
= [0,0,0,0]
        pre_hist_means = [prehistmean, prehistmean, prehistmean]
        pre_hist_sd = prehist_sd
        pre_hist_mean_Q = prehistmean_Q

```

```

pre_hist_sd_Q = prehist_sd_Q
covar_matrix = [[pre_hist_sd**2, pre_hist_covx1x2,
pre_hist_covx1x3],
                [pre_hist_covx1x2, pre_hist_sd**2,
pre_hist_covx2x3],
                [pre_hist_covx1x3, pre_hist_covx2x3,
pre_hist_sd**2]]

Q = {}
H = []
X_shocks = []
hist_len = init_hist_length

for i in range(hist_len):
    #Generates list of randoms of length N using the X shock means
and covariances given:
    X = np.random.multivariate_normal(pre_hist_means,
covar_matrix)
    #If any of the x shocks are zero, redraw:
    while (X[0] < 0) or (X[1] < 0) or (X[2] < 0):
        X = np.random.multivariate_normal(pre_hist_means,
covar_matrix)

    # Select first three random numbers to be demand shocks x1,
x2, x3

    x1 = X[0] #random shock x1
    x2 = X[1] #random shock x2
    x3 = X[2] #random shock x3

    #In the prehistory, there are random draws for quantities as
well.

    Q[i] = np.random.normal(pre_hist_mean_Q, pre_hist_sd_Q)
    values = [x1*Q[i], x2*Q[i], x3*Q[i]]

    #Price function.
    p = weights_mm[0] + (weights_mm[1] * values[0]) +
(weights_mm[2] * values[1]) + (weights_mm[3] * values[2])

    #Check if demand is upward sloping or flat (throws error)
    if ((weights_mm[1] * x1) + (weights_mm[2] * x2) +
(weights_mm[3] * x3)) >= 0:
        raise ValueError('Demand not downward sloping in period 0
in iteration' + str(runsim_it))

    #If price is negative, redraw the quantity. (previously price
was set to 0 if price was negative.)
    while (p <= 0):
        Q[i] = np.random.normal(pre_hist_mean_Q, pre_hist_sd_Q)
        values = [x1*Q[i], x2*Q[i], x3*Q[i]]
        p = weights_mm[0] + (weights_mm[1] * values[0]) +
(weights_mm[2] * values[1]) + (weights_mm[3] * values[2])

    #Another check for upward sloping demand

```

```

        if ((weights_mm[1] * x1) + (weights_mm[2] * x2) +
(weights_mm[3] * x3)) >= 0:
            raise ValueError('Demand upward sloping in pre-hist after
Q redraw in it. ' + str(runsim_it))

```

```

        #H is a list which contains a list [price, x1*Q, x2*Q, x3*Q]
for each period.

```

```

        H.append([p]+values)
        X_shocks.append(X)

```

```

    return H

```

```

def calibrate(self, H):

```

```

    MM = self.mm
    H = np.array(H)
    indexes = [0]

```

```

    for j in range(len(MM)):
        if MM[j] == 1:
            if j == 0:
                pass
            else:
                indexes.append(j)
    H_firm = H[:, indexes]

```

```

    #Store price and whichever explanatory variables are stored H_firm
(x1*Q, x2*Q, and/or x3*Q) separately:

```

```

    vals = H_firm[:,1:]
    price = H_firm[:,0]
    ##Perform OLS on values and price
    output = olsfunction(vals, price)
    ##Store estimated coefficients of demand:
    weights = output['coefficients']
    adj_r2 = output['adjrsq']

```

```

    for j in range(len(MM)):
        if MM[j] == 0:
            weights = np.insert(weights, j, 0)

```

```

    return weights, adj_r2

```

```

def chooseQ(self, periods, currentP, xvars, max_q, mean, sd):

```

```

    #Firm characteristics
    mm = self.mm
    c = self.cost
    weights = self.weights
    max_q = max_q
    x1, x2, x3 = xvars[0], xvars[1], xvars[2]
    period = currentP

```

```

#Set Q to 0 to initialize Q.
Q = 0

#Upward sloping or flat:
if (weights[1] * x1 * mm[1]) + (weights[2] * x2 * mm[2]) +
(weights[3] * x3 * mm[3]) >= 0:
    p_exp = weights[0] + (mm[1]*weights[1]*x1 +
mm[2]*weights[2]*x2 + mm[3]*weights[3]*x3) *2*max_q

    profit_exp = (p_exp - c) * max_q

    if profit_exp < 0:
        Q = 0
    else:
        Q = max_q
        self.cap += 1
        self.cap_posdemand += 1

#Downward sloping:
else:
    if weights[0]<0:
        Q = 0
    else:
        Q = (2*c - c - weights[0])/(3*(weights[1]*x1*mm[1] +
weights[2]*mm[2]*x2 + mm[3]*weights[3]*x3))
        p_exp = weights[0] + (mm[1]*weights[1]*x1 +
mm[2]*weights[2]*x2 + mm[3]*weights[3]*x3) *2*Q
        profit_exp = (p_exp - c) * Q
        if profit_exp < 0:
            raise ValueError('Neg profit')

#Boundary conditions: Quantity
if Q < 0:
    Q = 0
    self.Q_lessthan_zero += 1
if Q > max_q:
    Q = max_q
    self.cap += 1
    self.cap_maxedout += 1

return Q, p_exp, profit_exp

def run_iteration(firmnum, unknown, truebetas, init_betas,
                 mental_models, prehistlen, dist_params, cost, periods,
                 periods_examind,
                 max_q, iterations, directory, filebegin, param_num, Q,
                 p_exp, profit_exp, ideal_Q, firm_profits, firm_betas,
                 truevalues, pricevalues, init_weights, dfs, iter):
    """Runs a single iteration of the simulation"""

    #Bringing in variables
    param_num, filebegin, directory = param_num, filebegin, directory
    mental_models, init_betas, truebetas = mental_models, init_betas,
truebetas

```

```

    c, max_q, periods, firmnum, iterations = cost, max_q, periods,
firmnum, iterations
    prehistmean, prehiststd, mean, sd, prehistmean_Q, prehiststd_Q =
dist_params[0], dist_params[1], dist_params[2], dist_params[3],
dist_params[4], dist_params[5]

    covx1x2, covx1x3, covx2x3 = [0,0,0]
    mean = mean
    means = [mean, mean, mean]
    sd = sd
    covar_matrix = [[sd**2, covx1x2, covx1x3],
                    [covx1x2, sd**2, covx2x3],
                    [covx1x3, covx2x3, sd**2]]

    runsim_it = iter #added v2_5 to use as an index to unique the pre-
hist graphs

    Firms = {}
    for i in range(firmnum):
        mm = mental_models[i]
        b = init_betas[i]
        Firms[i] = Firm(mm, b, c)

        Firms[i].H = Firms[i].gen_init_history(prehistlen,
prehistmean, prehiststd,
prehistmean_Q,
prehiststd_Q, directory, filebegin, runsim_it, i)
        Firms[i].ideal_H = Firms[i].H[:]
        Firms[i].expectations = []

        Firms[i].weights = Firms[i].calibrate(Firms[i].H)[0] ##saves
the firm's initial weights
        weights = Firms[i].weights
        weights[0] = round(weights[0], 2)
        init_weights[i, iter] = Firms[i].weights

        Firms[i].firmvals = [] #initiate a list where the firm will
store the history of the interaction

        #comparing beginning of sim weights (which were arrived at by
calibrating) to the init_betas (or true betas)
        init_b = np.array(init_betas[i], dtype=np.float32)
        for weight in weights:
            if weight not in init_b:
                break

    Firms[0].weights_opp = Firms[1].weights
    Firms[0].mm_opp = Firms[1].mm

    for t in range(periods):

        X = np.random.multivariate_normal(means, covar_matrix)

        #If any of the x shocks are zero, redraw:

```

```

while (X[0] < 0) or (X[1] < 0) or (X[2] < 0):
    X = np.random.multivariate_normal(means, covar_matrix)

x1 = X[0]
x2 = X[1]
x3 = X[2]
xvars = [x1,x2,x3]

#if (truebetas[1] * x1) + (truebetas[3] * x3) >= 0:
    #output_file.write('upward or flat slope in period ' +
str(t))

for i in range(firmnum):

    weights = Firms[i].weights
    mm = Firms[i].mm

    #When the firm perceives demand to be upward sloping
    #if (weights[1] * x1 * mm[1]) + (weights[2] * x2 * mm[2])
+ (weights[3] * x3 * mm[3]) >= 0:
        # output_file.write('\n firm ' + str(i) + ' perceived
upward or flat sloping before choosing Q in period ' + str(t))
        # output_file.write('\n' + str(weights[1]) + ', ' +
str(weights[2]) + ', ' + str(weights[3]))

        #Firm i chooses a quantity for this period t.
        Q[t, i], p_exp[t,i], profit_exp[t,i] =
Firms[i].chooseQ(periods, t, xvars, max_q, mean, sd)

        Firms[i].Qperceived = Q[t,i] * 2

        #Add values to the firm's history of what it thinks
happened in this interaction
        Qper = Firms[i].Qperceived
        vals = [x1*Qper, x2*Qper, x3*Qper]
        Firms[i].firmvals.append(vals) #Store firm i's perceived
values of X*Q

    #Calculate total actual Q per period:
    Qtotal = np.sum(Q[t,:])

    #Fill dictionary with true values per period:
    truevalues[t] = [x1*Qtotal, x2*Qtotal, x3*Qtotal]

    #calculate price per period and save in pricevalues array
    p = np.inner(truebetas, [1] + truevalues[t])
    pricevalues[t] = p

    '''Create history of explanatory vars, prices, profits.'''
    '''Calibrate to fit OLS to what has happened in past
periods.'''

    comb_hist = []
    for i in range(firmnum):

```

```

        Firms[i].H.append([p] + Firms[i].firmvals[t])
        Firms[i].profit = (p-c)*Q[t,i]
        Firms[i].expectations.append([p_exp[t,i],
profit_exp[t,i]])
        firm_profits[t,i] = Firms[i].profit
        comb_hist.append(Firms[i].H)

    for i in range(firmnum):
        weights, adjr2 = Firm.calibrate(Firms[i], H = Firms[i].H)
        firm_betas[t,i] = weights
        Firms[i].weights = weights

    return Firms

def run_period_pooled(firmnum, unknown, truebetas, init_betas,
                    mental_models, prehistlen, dist_params, cost,
periods, periods_examind,
                    max_q, iterations,
                    directory, filebegin, param_num, Q, p_exp,
profit_exp, ideal_Q, firm_profits, firm_betas,
                    truevalues, pricevalues, init_weights, dfs, iter):

    #Bringing in variables
    param_num, filebegin, directory = param_num, filebegin, directory
    mental_models, init_betas, truebetas = mental_models, init_betas,
truebetas
    c, max_q, periods, firmnum, iterations = cost, max_q, periods,
firmnum, iterations
    prehistmean, prehiststd, mean, sd, prehistmean_Q, prehiststd_Q =
dist_params[0], dist_params[1], dist_params[2], dist_params[3],
dist_params[4], dist_params[5]

    covx1x2, covx1x3, covx2x3 = [0,0,0]
    mean = mean
    means = [mean, mean, mean]
    sd = sd
    covar_matrix = [[sd**2, covx1x2, covx1x3],
                    [covx1x2, sd**2, covx2x3],
                    [covx1x3, covx2x3, sd**2]]

    runsim_it = iter #added v2_5 to use as an index to unique the pre-
hist graphs

    Firms = run_iteration(firmnum, unknown, truebetas, init_betas,
                    mental_models, prehistlen, dist_params, cost, periods,
periods_examind,
                    max_q, iterations,
                    directory, filebegin, param_num, Q, p_exp, profit_exp,
ideal_Q, firm_profits, firm_betas,
                    truevalues, pricevalues, init_weights, dfs, iter)

```

```

'''Saving simulation data to csv.'''
data = []
for n in range(firmnum):
    firmhist = np.array(Firms[n].H[prehistlen:]) #excludes the
prehistory
    for l in range(len(firmhist)):
        data.append(firmhist[l])
    firmhist_df = pd.DataFrame(data, columns = ['price', 'x1*Q',
'x2*Q', 'x3*Q'])
    del firmhist_df['price']
    #split into 2 so they can be concatenated side-by-side; before
this, the two firm histories are stacked on top of one another.
    firmhist_df1 = firmhist_df.iloc[:periods,:]
    firmhist_df2 = firmhist_df.iloc[periods:,:]
    firmhist_df2.index = firmhist_df2.index - periods #corrects index

#firm expectations dataframe:
exp_data = {}
exp_dict = {}
for n in range(firmnum):
    exp_data[n] = []
    firmexp = np.array(Firms[n].expectations)
    for l in range(len(firmexp)):
        exp_data[n].append(firmexp[l])
    exp_dict[n] = pd.DataFrame(exp_data[n], columns =
['exp_price', 'exp_profit'])
exp_df = pd.concat([exp_dict[0], exp_dict[1]], axis=1, sort =
True)
exp_df.columns = ['exp_price_1', 'exp_profit_1', 'exp_price_2',
'exp_profit_2']

#make firm profit dataframe:
firmprof_df = pd.DataFrame(firm_profits, columns = ['prof1',
'prof2'])
#make quantity dataframe:
Q_df = pd.DataFrame(Q, columns = ['Q1', 'Q2'])
Q_df['total_Q'] = Q_df.Q1 + Q_df.Q2

#make price dataframe (Don't need this..same as first column of
firmhist_df):
price_df = pd.DataFrame(pricevalues, index = [0]).transpose()
price_df.columns = ['price'] # # # 100 rows of 24 vars each
iteration...

#dataframe of firm betas... want to separate firm 1 and firm 2
using multi-index...
firmb_df = pd.DataFrame.from_dict(firm_betas)
firmb_df= firmb_df.transpose()
firmb_df = firmb_df.reset_index(level=[1])
firmb_df.columns = ['firm', 'int', 'b1', 'b2', 'b3']
#separate into betas by firm, so can be concatenated side-by-side.
firmb_df1 = firmb_df[firmb_df['firm']==0]
firmb_df1.columns = ['firm', 'f1_int', 'f1_b1', 'f1_b2', 'f1_b3']

```

```

del(firmb_df1['firm'])
firmb_df2 = firmb_df[firmb_df['firm']==1]
firmb_df2.columns = ['firm', 'f2_int', 'f2_b1', 'f2_b2', 'f2_b3']
del(firmb_df2['firm'])

#dataframe of truevalues (a dictionary)
truevals_df = pd.DataFrame.from_dict(truevalues).transpose()
truevals_df.columns = ['true_x1Q', 'true_x2Q', 'true_x3Q']

sim_data =
pd.concat([price_df,Q_df,truevals_df,firmprof_df,firmb_df1,firmb_df2,firmh
ist_df1,firmhist_df2,exp_df], axis=1, sort = True)
dfs.append(sim_data)

return sim_data

def run_simulation(firmnum, unknown, truebetas, init_betas,
                 mental_models, prehistlen, dist_params, cost, periods,
                 periods_examind,
                 max_q, iterations, directory, filebegin, param_num,
                 file_id):
    """
    Runs the simulation given parameters. Returns the filepath of the csv
    containing the simulation data and a dataframe containing the initial
    parameters.
    Calls run_period_pooled() in parallel process.
    """

    #Create directory if it does not already exist
    if not os.path.exists(directory):
        os.makedirs(directory)

    #Distribution parameters for the x demand shocks
    prehistmean, prehiststd, mean, sd, prehistmean_Q, prehiststd_Q =
*dist_params,
    covx1x2, covx1x3, covx2x3 = [0,0,0]
    means = [mean, mean, mean]
    sd = sd
    covar_matrix = [[sd**2, covx1x2, covx1x3],
                    [covx1x2, sd**2, covx2x3],
                    [covx1x3, covx2x3, sd**2]]

    #Create empty dictionaries to hold simulation info
    Q = np.empty((periods, firmnum))
    p_exp = np.empty((periods, firmnum))
    profit_exp = np.empty((periods, firmnum))
    ideal_Q = np.empty((periods, firmnum))
    firm_profits = np.empty((periods, firmnum))
    firm_betas = {}
    truevalues = {}
    pricevalues = {}
    init_weights = {}

```

```

#Create a master list of dataframes to hold the dataframe created by
each iteration.
dfs = []

#parallel processing: runs multiple iterations in parallel.
with concurrent.futures.ProcessPoolExecutor() as executor:
    periods_to_run = range(iterations)

    for iter in periods_to_run:
        sim_data = run_period_pooled(firmnum, unknown, truebetas,
init_betas,
                                mental_models, prehistlen, dist_params, cost, periods,
periods_examind,
                                max_q, iterations, directory, filebegin, param_num, Q,
p_exp, profit_exp, ideal_Q, firm_profits, firm_betas,
                                truevalues, pricevalues, init_weights, dfs, iter)

#Initial weights dataframe: contains average initial weights to check
that firms begin with intended parameters
initw_df = pd.DataFrame(init_weights).T
init_totals = np.zeros((2,4))
for i in range(firmnum):
    for j in range(iterations):
        init_totals[i] = init_totals[i] + initw_df.loc[i,j]
    init_totals[i] = init_totals[i]/iterations
inits1 = pd.DataFrame(init_totals[0]).T
inits2 = pd.DataFrame(init_totals[1]).T
initav_df = pd.concat([inits1,inits2],axis = 1, sort = True)
initav_df.columns = ['f1_int', 'f1_b1', 'f1_b2', 'f1_b3', 'f2_int',
'f2_b1', 'f2_b2', 'f2_b3']
initav_df['period'] = 0
initial_weights = initav_df

#Create dataframe containing average results over all iterations:
totals = np.zeros_like(sim_data)
totals_df = pd.DataFrame(totals)
for df in dfs:
    totals_df.columns = sim_data.columns
    totals_df.index = sim_data.index
    totals_df = df.add(totals_df, fill_value = 0)
av_data = totals_df/iterations
av_data['period'] = sim_data.index + 1
av_data.index = sim_data.index
av_df = pd.DataFrame.from_dict(av_data) #unnecessary step?

#Storing run information in csv and return csv name (in addition to
initial weights)
csv_name = file_id + '_sim_data.csv'
av_df.to_csv(os.path.join(directory, csv_name), header = True)

return csv_name, initial_weights

```

**S3\_graphfunctions.py**

```

# -*- coding: utf-8 -*-
"""
Friday, Feb. 4 2022

"""

import os
import numpy as np
import pandas as pd
import matplotlib
matplotlib.rcParams['figure.max_open_warning'] = 0
import matplotlib.pyplot as plt
import seaborn as sns

def graph_label(figure, df, graph_content, graph_colors, label_params):

    figure, df = figure, df

    ##Rounding data and finding averages
    f1_data_round = round(graph_content[0], 2)
    f2_data_round = round(graph_content[1], 2)
    av_f2_data = np.mean(f2_data_round)
    av_f1_data = np.mean(f1_data_round)

    F1_inc, F2_inc, zero_inc, zero_horiz = label_params[0],
    label_params[1], label_params[2], label_params[3]
    f1_edgecolor, f2_edgecolor, f1_boxcolor, f2_boxcolor =
    graph_colors[0], graph_colors[1], graph_colors[2], graph_colors[3]

    #Loop through zipped points to graph.#
    #Firm 1#
    for pt_zip in zip(df.period, f1_data_round):
        period = pt_zip[0]
        if av_f1_data < av_f2_data:
            #if f1 is smaller, adjust it up
            if period % 25 == 0 and period != 0 and period !=100:
                figure.annotate(str(pt_zip[1]), xy=(pt_zip[0], pt_zip[1] +
F1_inc), fontsize = 8, bbox=dict(boxstyle="round4,pad=.5", edgecolor =
f1_edgecolor, fc=f1_boxcolor))
                if period == 0:
                    figure.annotate(str(pt_zip[1]), xy=(pt_zip[0] + 8,
pt_zip[1] + zero_inc), fontsize = 8, bbox=dict(boxstyle="round4,pad=.5",
edgecolor = f1_edgecolor, fc=f1_boxcolor))
                if period == 100:
                    figure.annotate(str(pt_zip[1]), xy=(pt_zip[0] - 5,
pt_zip[1] + F1_inc), fontsize = 8, bbox=dict(boxstyle="round4,pad=.5",
edgecolor = f1_edgecolor, fc=f1_boxcolor))
            if av_f1_data > av_f2_data:
                #if f1 is larger, adjust it down
                if period % 25 == 0 and period != 0 and period !=100:

```

```

        figure.annotate(str(pt_zip[1]), xy=(pt_zip[0], pt_zip[1] -
F1_inc), fontsize = 8, bbox=dict(boxstyle="round4,pad=.5", edgecolor =
f1_edgecolor, fc=f1_boxcolor))
        if period == 0:
            figure.annotate(str(pt_zip[1]), xy=(pt_zip[0] + 8,
pt_zip[1] - zero_inc), fontsize = 8, bbox=dict(boxstyle="round4,pad=.5",
edgecolor = f1_edgecolor, fc=f1_boxcolor))
        if period == 100:
            figure.annotate(str(pt_zip[1]), xy=(pt_zip[0] - 5,
pt_zip[1] - F1_inc), fontsize = 8, bbox=dict(boxstyle="round4,pad=.5",
edgecolor = f1_edgecolor, fc=f1_boxcolor))

#Firm 2#
for pt_zip in zip(df.period, f2_data_round):
    period = pt_zip[0]
    if av_f2_data > av_f1_data:
        #if f2 is larger, adjust it down
        if period % 25 == 0 and period != 0 and period != 100:
            figure.annotate(str(pt_zip[1]), xy=(pt_zip[0], pt_zip[1] -
F2_inc), fontsize = 8, bbox=dict(boxstyle="round4,pad=.5", edgecolor =
f2_edgecolor, fc=f2_boxcolor))
        if period == 100:
            figure.annotate(str(pt_zip[1]), xy=(pt_zip[0] - 5,
pt_zip[1] - F2_inc), fontsize = 8, bbox=dict(boxstyle="round4,pad=.5",
edgecolor = f2_edgecolor, fc=f2_boxcolor))
        if av_f2_data < av_f1_data:
            #if f2 is smaller, adjust it up
            if period % 25 == 0 and period != 0 and period != 100:
                figure.annotate(str(pt_zip[1]), xy=(pt_zip[0], pt_zip[1] +
F2_inc), fontsize = 8, bbox=dict(boxstyle="round4,pad=.5", edgecolor =
f2_edgecolor, fc=f2_boxcolor))
            if period == 100:
                figure.annotate(str(pt_zip[1]), xy=(pt_zip[0] - 5,
pt_zip[1] + F2_inc), fontsize = 8, bbox=dict(boxstyle="round4,pad=.5",
edgecolor = f2_edgecolor, fc=f2_boxcolor))

def graph_sns(csv_name, initial_weights, firmnum, unknown, truebetas,
init_betas,
                mental_models, prehistlen, dist_params, cost, periods,
periods_examind, max_q, iterations,
                directory, filebegin, param_num, parameters_dict):

    ##graphing_params = [csv_name, initial_weights, firmnum, unknown,
truebetas, init_betas,
    ##                mental_models, prehistlen, dist_params, cost,
periods, periods_examind, max_q, iterations,
    ##                directory, filebegin, param_num]

    directory = directory
    mm = mental_models
    truebetas=truebetas
    b = truebetas[1]
    periods = periods

```

```

iw_df = initial_weights

#bring in data saved in csv:
df = pd.read_csv(os.path.join(directory, csv_name))

#Make a beta data frame to include period 0
dfbeta = df.reindex(columns = ['period', 'f1_int', 'f1_b1', 'f1_b2',
'f1_b3', 'f2_int', 'f2_b1', 'f2_b2', 'f2_b3', 'exp_price_1',
'exp_price_2', 'exp_profit_1', 'exp_profit_2'])
dfbeta = pd.concat([dfbeta, iw_df], axis = 0, sort =
True).sort_values(by=['period']).reset_index()

sns.set_style('white')
sns.set_context('paper', font_scale=2)

##bbox variables:
f1_edgecolor = 'black'
f2_edgecolor = 'grey'
f1_boxcolor = '1.0'
f2_boxcolor = '0.8'
graph_colors = [f1_edgecolor, f2_edgecolor, f1_boxcolor, f2_boxcolor]

b1 = np.round(dfbeta.f1_b1[0], 0)

#####
# Plot 1 - idiosyncratic slope estimate by firm #
#####

## Plotting lines. ##
#Graph beta1 for firm 1.#
graph_content = {}
if mm[0] == [1,1,0,1]:
    fig1 = sns.lineplot(x = 'period', y = 'f1_b1', data = dfbeta,
label = 'Firm 1', color = 'black')
    graph_content[0] = dfbeta.f1_b1
elif mm[0] == [1,0,1,1]:
    fig1 = sns.lineplot(x = 'period', y = 'f1_b2', data = dfbeta,
label = 'Firm 1', color = 'black')
    graph_content[0] = dfbeta.f1_b2
if mm[1] == [1,1,0,1]:
    sns.lineplot(x = 'period', y = 'f2_b1', data = dfbeta, label =
'Firm 2', color = 'grey')
    f2_beta = dfbeta.f2_b1
    graph_content[1] = dfbeta.f2_b1
elif mm[1] == [1,0,1,1]:
    sns.lineplot(x = 'period', y = 'f2_b2', data = dfbeta, label =
'Firm 2', color = 'grey')
    f2_beta = dfbeta.f2_b2
    graph_content[1] = dfbeta.f2_b2

#Set the label params depending on model type.#
label_params = [0.25, 0.04, 0, 0]

```

```

#graphing_label function takes: figure name, all graphing params, and
then label_params list
graph_label(fig1, dfbeta, graph_content, graph_colors, label_params)

fig1.set(ylabel='Idiosyncratic variable')
fig1.lines[1].set_linestyle("--")
fig1.legend(loc='upper center', bbox_to_anchor=(0.5, -0.2),
shadow=True, ncol=2)
plt.savefig(os.path.join(directory, 'plot1_idio' + str(filebegin) +
'b1_is_' + str(b1) + 'seaborn_plt1_3' + '.png'), bbox_inches='tight', dpi
= 600)
plt.close()
plt.cla()
plt.clf()

#####
# Plot 2 - industry variable estimate by firm #
#####

##Plotting Lines##
# Plot beta3 for both firms. #
fig2 = sns.lineplot(x = 'period', y = 'f1_b3', data = dfbeta, label =
'Firm 1', color = 'black')
sns.lineplot(x = 'period', y = 'f2_b3', data = dfbeta, label = 'Firm
2', color = 'grey')
graph_content = {0: dfbeta.f1_b3, 1: dfbeta.f2_b3}

#Set different positional variables depending on model type.#
label_params = [0.15, 0.15, 0, 5]

graph_label(fig2, dfbeta, graph_content, graph_colors, label_params)

fig2.set(ylabel='Industry variable')
fig2.lines[1].set_linestyle("--")
fig2.legend(loc='upper center', bbox_to_anchor=(0.5, -0.2),
shadow=True, ncol=2)
plt.savefig(os.path.join(directory, 'plot2_ind_' + str(filebegin) +
'b1_is_' + str(b1) + 'seaborn_plt1_3' + '.png'), bbox_inches='tight', dpi
= 600)
plt.close()
plt.cla()
plt.clf()

#####
# Plot 3 - intercept estimate by firm #
#####

##Plotting Lines##
# Plot intercept for both firms. #
fig3 = sns.lineplot(x = 'period', y = 'f1_int', data = dfbeta, label =
'Firm 1', color = 'black')
sns.lineplot(x = 'period', y = 'f2_int', data = dfbeta, label = 'Firm
2', color = 'grey')

```

```

graph_content = {0: dfbeta.f1_int, 1: dfbeta.f2_int}

#Set different positional variables depending on model type.#
label_params = [0.15, 0.15, 0, 5]

graph_label(fig3, dfbeta, graph_content, graph_colors, label_params)

fig3.set(ylabel='Intercept')
fig3.lines[1].set_linestyle("--")
fig3.legend(loc='upper center', bbox_to_anchor=(0.5, -0.2),
shadow=True, ncol=2)
plt.savefig(os.path.join(directory, 'plot3_int_' + str(filebegin) +
'b1_is_' + str(b1) + 'seaborn_plt1_3' + '.png'), bbox_inches='tight', dpi
= 600)
plt.close()
plt.cla()
plt.clf()

#####
# Plot 4 - Quantity by firm #
#####

fig4 = sns.lineplot(x = 'period', y = 'Q1', data = df, label = 'Firm
1', color = 'black')
sns.lineplot(x = 'period', y = 'Q2', data = df, label = 'Firm 2',
color = 'grey')
graph_content = {0: df.Q1, 1: df.Q2}

biggestQ = max(max(df.Q1), max(df.Q2))
smallestQ = min(min(df.Q1), min(df.Q2))
fig4.set_ylim([smallestQ - 0.4, biggestQ + 0.4])

label_params = [0.25, 0.25, 0, 5]

graph_label(fig4, df, graph_content, graph_colors, label_params)

fig4.set(ylabel='Quantity')
fig4.lines[1].set_linestyle("--")
fig4.legend(loc='upper center', bbox_to_anchor=(0.5, -0.2),
shadow=True, ncol=2)
plt.savefig(os.path.join(directory, 'plot4_q_' + str(filebegin) +
'b1_is_' + str(b1) + 'seaborn_plt1_3' + '.png'), bbox_inches='tight', dpi
= 600)
plt.close()
plt.cla()
plt.clf()

#####
# Plot 5 - Price #
#####
fig5 = sns.lineplot(x = 'period', y = 'price', data = df, label =
'price', color = 'black')
fig5.set(ylabel='Price')

```

```

fig5.legend(loc='upper center', bbox_to_anchor=(0.5, -0.2),
shadow=True, ncol=1)

fig5.set_ylim([min(df.price) - 0.5, max(df.price) + 0.5])

price_round = df.price.round(2)
mean_p = np.mean(price_round)
for pt_zip in zip(df.period, price_round):
    period = pt_zip[0]
    if (period == 1 or period % 25 == 0) and period != 100:
        if pt_zip[1] > mean_p:
            #Adjust up if the point is above the mean
            fig5.annotate(str(pt_zip[1]), xy = (pt_zip[0], pt_zip[1] +
0.2), fontsize = 8, bbox=dict(boxstyle="round4,pad=.5", edgecolor =
'grey', fc='1.0'))
        if pt_zip[1] < mean_p:
            #Adjust down if the point is below the mean
            fig5.annotate(str(pt_zip[1]), xy = (pt_zip[0], pt_zip[1] -
0.2), fontsize = 8, bbox=dict(boxstyle="round4,pad=.5", edgecolor =
'grey', fc='1.0'))
    if period == 100:
        if pt_zip[1] > mean_p:
            fig5.annotate(str(pt_zip[1]), xy = (pt_zip[0] - 5,
pt_zip[1] + 0.2), fontsize = 8, bbox=dict(boxstyle="round4,pad=.5",
edgecolor = 'grey', fc='1.0'))
        if pt_zip[1] < mean_p:
            fig5.annotate(str(pt_zip[1]), xy = (pt_zip[0] - 5,
pt_zip[1] - 0.2), fontsize = 8, bbox=dict(boxstyle="round4,pad=.5",
edgecolor = 'grey', fc='1.0'))
    plt.savefig(os.path.join(directory, 'plot5_p_' + str(filebegin) +
'b1_is_' + str(b1)+ 'seaborn_plt1_3' + '.png'), bbox_inches='tight', dpi =
600)
plt.close()
plt.cla()
plt.clf()

#####
# Plot 6 - Profit by firm #
#####
fig6 = sns.lineplot(x = 'period', y = 'prof1', data = df, label =
'Firm 1', color = 'black')
sns.lineplot(x = 'period', y = 'prof2', data = df, label = 'Firm 2',
color = 'grey')
fig6.set(ylabel='Profit')
fig6.lines[1].set_linestyle("--")
fig6.legend(loc='upper center', bbox_to_anchor=(0.5, -0.2),
shadow=True, ncol=1)

biggestprof = max(max(df.prof1), max(df.prof2))
smallestprof = min(min(df.prof1), min(df.prof2))
fig6.set_ylim([smallestprof - 3, biggestprof + 3])

prof1_round = df.prof1.round(2)

```

```

for pt_zip in zip(df.period, prof1_round):
    period = pt_zip[0]
    if pt_zip[1] > df.prof2[period-1]:
        #If F1 profits are higher, annotate them higher
        if (period == 1 or period % 25 == 0) and period != 100:
            fig6.annotate(str(pt_zip[1]), xy=(pt_zip[0], biggestprof +
1), fontsize = 8, bbox=dict(boxstyle="round4,pad=.5", edgecolor =
f1_edgecolor, fc=f1_boxcolor))
        if period == 100:
            fig6.annotate(str(pt_zip[1]), xy=(pt_zip[0] - 5,
biggestprof + 1), fontsize = 8, bbox=dict(boxstyle="round4,pad=.5",
edgecolor = f1_edgecolor, fc=f1_boxcolor))
    else:
        #If F1 profits are lower, annotate them lower
        if (period == 1 or period % 25 == 0) and period != 100:
            fig6.annotate(str(pt_zip[1]), xy=(pt_zip[0], smallestprof
- 1), fontsize = 8, bbox=dict(boxstyle="round4,pad=.5", edgecolor =
f1_edgecolor, fc=f1_boxcolor))
        if period == 100:
            fig6.annotate(str(pt_zip[1]), xy=(pt_zip[0] - 5,
smallestprof - 1), fontsize = 8,  bbox=dict(boxstyle="round4,pad=.5",
edgecolor = f1_edgecolor, fc=f1_boxcolor))
    prof2_round = df.prof2.round(2)
    for pt_zip in zip(df.period, prof2_round):
        period = pt_zip[0]
        if pt_zip[1] > df.prof1[period-1]:
            #If F2 profits are higher, annotate them higher
            if (period == 1 or period % 25 == 0) and period != 100:
                fig6.annotate(str(pt_zip[1]), xy=(pt_zip[0], biggestprof +
1), fontsize = 8,  bbox=dict(boxstyle="round4,pad=.5", edgecolor =
f2_edgecolor, fc=f2_boxcolor))
            if period == 100:
                fig6.annotate(str(pt_zip[1]), xy=(pt_zip[0] - 5,
biggestprof + 1), fontsize = 8,  bbox=dict(boxstyle="round4,pad=.5",
edgecolor = f2_edgecolor, fc=f2_boxcolor))
        else:
            #If F2 profits are lower, annotate them lower
            if (period == 1 or period % 25 == 0) and period != 100:
                fig6.annotate(str(pt_zip[1]), xy=(period, smallestprof -
1), fontsize = 8,  bbox=dict(boxstyle="round4,pad=.5", edgecolor =
f2_edgecolor, fc=f2_boxcolor))
            if period == 100:
                fig6.annotate(str(pt_zip[1]), xy=(period - 5, smallestprof
- 1), fontsize = 8,  bbox=dict(boxstyle="round4,pad=.5", edgecolor =
f2_edgecolor, fc=f2_boxcolor))
    plt.savefig(os.path.join(directory, 'plot6_profit_' + str(filebegin) +
'b1_is_' + str(b1)+ 'seaborn_plt1_3' + '.png'), bbox_inches='tight', dpi =
600)
    plt.close()
    plt.cla()
    plt.clf()

```

### S3\_paramfunctions.py

```

# -*- coding: utf-8 -*-
"""
Feb. 4 2022

"""

import os
import pandas as pd
import matplotlib
matplotlib.rcParams['figure.max_open_warning'] = 0

import S3_simfunctions as sim
import S3_graphfunctions as gr

def generate_param_list(iterations, coeffs, phx_var, phq_var, x_var,
    phlen, max_q, periods,
                        last_fold, directory, param_list = []):

    true_alpha_0, true_idio_beta, true_ind_beta = coeffs['true_alpha_0'],
coeffs['true_idio_beta'], coeffs['true_ind_beta']
    cor_alpha_0, cor_idio_beta, cor_ind_beta = coeffs['cor_alpha_0'],
coeffs['cor_idio_beta'], coeffs['cor_ind_beta']
    inc_alpha_0, inc_idio_beta, inc_ind_beta = coeffs['inc_alpha_0'],
coeffs['inc_idio_beta'], coeffs['inc_ind_beta']

    param_list = [2, 'q', [true_alpha_0, true_idio_beta, 0, true_ind_beta],

[[cor_alpha_0, cor_idio_beta, 0, cor_ind_beta], [inc_alpha_0, 0, inc_idio_beta, i
nc_ind_beta]],
                [[1, 1, 0, 1], [1, 0, 1, 1]], phlen, [1, phx_var, 1, x_var, 2, phq_var],
                50, periods, periods, max_q, iterations,
                os.path.join(directory, 'cm=sr_base_dup') , 'base_sr_', 1]

    return param_list

def run_through_parameters(param_list, directory, version_no, last_fold,
rerun_sim):

    csv_name = {}
    initial_weights = {}

    if not os.path.exists(directory):
        os.makedirs(directory)

    param = param_list
    parameters_dict = {'true_alpha_0': param[2][0], 'true_idio_beta':
param[2][1], 'true_ind_beta': param[2][3],
                    'cor_alpha_0': param[3][0][0], 'cor_idio_beta':
param[3][0][1], 'cor_ind_beta': param[3][0][3],
                    'inc_alpha_0': param[3][1][0], 'inc_idio_beta':
param[3][1][1], 'inc_ind_beta': param[3][1][3],

```

```

        'phlen': param[5], 'phx_var': param[6][1], 'x_var':
param[6][3], 'phq_var': param[6][5],
        'periods': param[8], 'max_q': param[10],
'iterations': param[11]}

    var_index = parameters_dict['true_idio_beta']
    file_id = 'sr_base_duop' + str(var_index)

    directory = param[12]
    sim_csv_name = file_id + '_sim_data.csv'

    if not os.path.exists(os.path.join(directory, sim_csv_name)):
        print('found no csv already existing at: ')
        print(os.path.join(directory, sim_csv_name))
        csv_name[var_index], initial_weights[var_index] =
sim.run_simulation(*param, file_id)
    else:
        print('This csv exists: ' + str(sim_csv_name))
        if rerun_sim == False:
            iwf1 = pd.DataFrame(param[4][0]).T
            iwf2 = pd.DataFrame(param[4][1]).T
            initial_weights[var_index] = pd.concat([iwf1, iwf2], axis=1,
sort=True)
            initial_weights[var_index].columns = ['f1_int', 'f1_b1',
'f1_b2', 'f1_b3', 'f2_int', 'f2_b1', 'f2_b2', 'f2_b3']
            initial_weights[var_index]['period'] = 0
            csv_name[var_index] = os.path.join(directory, sim_csv_name)
        else:
            print('rerunning simulation')
            csv_name[var_index], initial_weights[var_index] =
sim.run_simulation(*param, file_id)

    gr.graph_sns(csv_name[var_index], initial_weights[var_index], *param,
parameters_dict=parameters_dict)

    dir_list = [os.path.join(os.getcwd(), str(version_no), last_fold,
str([parameters_dict['true_alpha_0'], parameters_dict['true_idio_beta'], 0, p
arameters_dict['true_ind_beta']]),
        'sr_base_duop'), [*param]]

    return csv_name, dir_list, initial_weights

```
